# Supplementary material for: Fixed Combination of Travoprost and Timolol Maleate Reduces Intraocular Pressure in Japanese Patients with Primary Open-Angle Glaucoma or Ocular Hypertension: A Prospective Multicenter Open-Label Study
Source: PubMed Central journal article supplement — Adv Ther. 2015 Sep 30;32(9):823–37. doi: 10.1007/s12325-015-0246-9 (PMC4604505; doi:10.1007/s12325-015-0246-9), 2015-09-30
Supplement: 12325_2015_246_MOESM1_ESM.pdf [file 12325_2015_246_MOESM1_ESM.pdf]

## **ELECTRONIC SUPPLEMENTARY MATERIAL**

IOP Checked and Assessed in Normal tension Glaucoma by Exceptional glaucomatologists 2 (I.CHANGE2) study group:

1. Okazaki Eye Clinic, Hokkaido, Japan: Hiroko Okazaki
2. Department of Ophthalmology, Tohoku University, Miyagi, Japan: Nobuo Fuse
3. Kido Eye Clinic, Niigata, Japan: Motohiro Shirakashi
4. Yaoeda Eye Clinic, Niigata, Japan: Kiyoshi Yaoeda
5. Juntendo University Urayasu Hospital, Chiba, Japan: Itaru Kimura
6. Department of Ophthalmology, The Jikei University School of Medicine, Tokyo, Japan: Tadashi Nakano
7. Yoshikawa Eye Clinic, Tokyo, Japan: Keiji Yoshikawa
8. Ueno Eye Clinic, Tokyo, Japan: Tairo Kimura
9. Nakano General Hospital, Tokyo, Japan: Hirotaka Suzumura
10. Department of Ophthalmology, Fussa Hospital, Tokyo, Japan: Toyoaki Tsumura
11. Nihonmatsu Eye Hospital, Tokyo, Japan: Mami Nanno
12. Nishikamakura Tanino Eye Clinic, Kanagawa, Japan: Tomihiko Tanino
13. Department of Ophthalmology, Fukui-ken Saiseikai Hospital, Fukui, Japan: Koji Nitta
14. Tajimi Iwase Eye Clinic, Gifu, Japan: Aiko Iwase
15. Yamabayashi Eye Clinic, Aichi, Japan: Shigeki Yamabayashi
16. Reiko Eye Clinic, Osaka, Japan: Reiko Sugimoto
17. Hirakata Yamagishi Eye Clinic, Osaka, Japan: Kazuya Yamagishi
18. Kozaki Eye Clinic, Osaka, Japan: Jun Kozaki
19. Sagara Eye Clinic, Yamaguchi, Japan: Takeshi Sagara
20. Department of Ophthalmology, Minami-Matsuyama Hospital, Ehime, Japan: Shiro Mizoue
21. Mizoguchi Eye Clinic, Nagasaki, Japan: Takanori Mizoguchi
22. Ozaki Eye Clinic, Miyazaki, Japan: Mineo Ozaki
23. Unoki Eye Clinic, Kagoshima, Japan: Kazuhiko Unoki
24. Nakamura Eye Clinic, Okinawa, Japan: Yoshimi Nakamura
